# Supplementary material for: Morphology control of polyaniline by dopant grown on hollow carbon fibers as high-performance supercapacitor electrodes
Source: Springer Nature journal article supplement (doi:10.1007/s10570-017-1505-5), 2017-10-05
Supplement: MOESM1 [file 15112456]

Morphology control of polyaniline by dopant grown on hollow carbon fibers as high-performance supercapacitor electrodes

Weibing Xu*a,b*, Bin Mu**a* and Aiqin Wang**a*

*a* State Key Laboratory of Solid Lubrication, Centre of Eco-Materials and Green Chemistry, Lanzhou Institute of Chemical Physics, Chinese Academy of Sciences, Lanzhou 730000, China.

*b* University of Chinese Academy of Sciences, Beijing 100049, P.R. China.


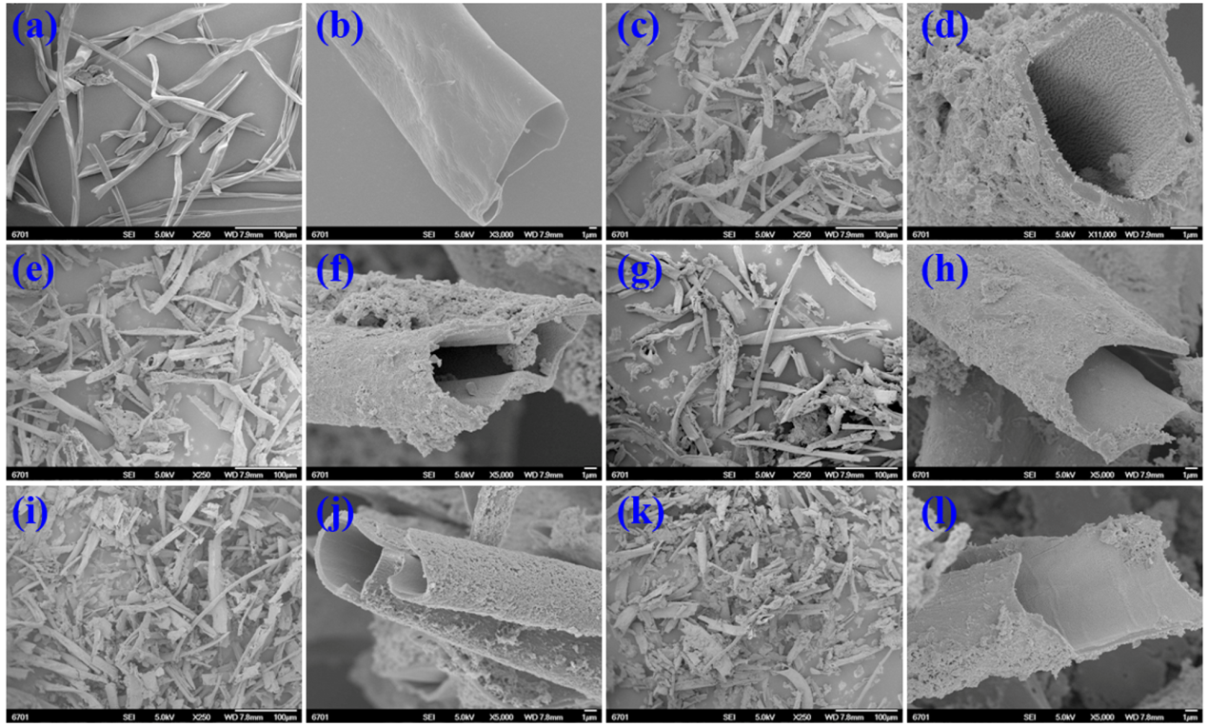


Fig. S1 SEM images of CKF (a, b), HCl (c, d), H2SO4 (e, f), H3PO4 (g, h), HClO4 (I, j), PTSA (k, l) doped PANI@CKF


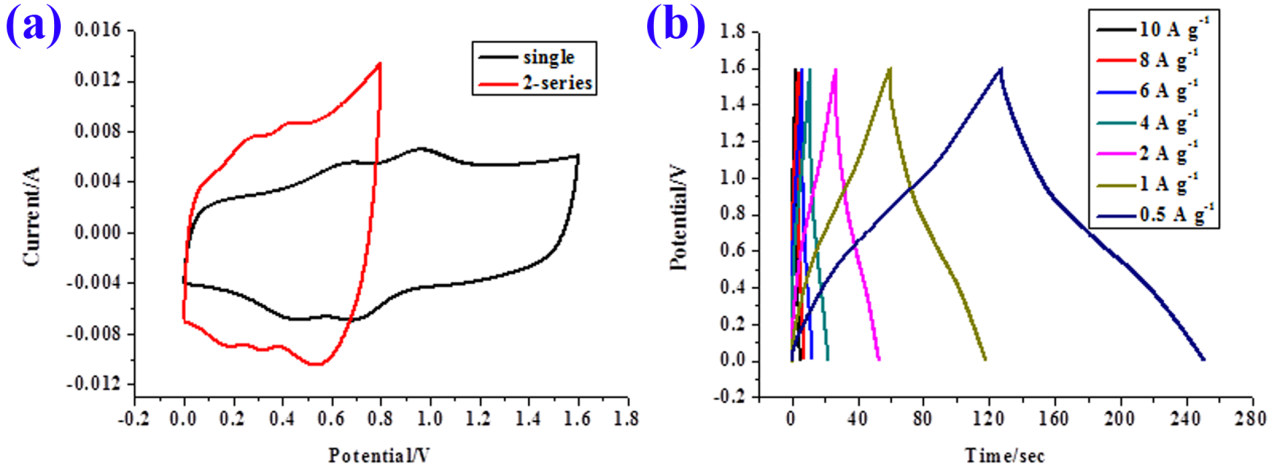


Fig. S2 (a) CV and (b) GCD curves of two supercapacitor devices.

**Table S1** the conductivity of all PANI@CKF composites

| Doping agent | HClO4 | H2SO4 | H3PO4 | HCl | PTSA |
| --- | --- | --- | --- | --- | --- |
| Conductivity (S cm-1) | 1.57 | 0.61 | 0.44 | 0.48 | 0.32 |

**Table S2** Electrochemical parameters of these PANI@CKF electrodes from EIS tests

| Doping agent | H2SO4 | H3PO4 | HCl | HClO4 | PTSA |
| --- | --- | --- | --- | --- | --- |
| Rct(Ω) | 3.5 | 2.8 | 10.2 | 2.4 | 4 |
